# Supplementary material for: A new surfactin-C17 produced by Bacillus subtilis TD7 with a low critical micelle concentration and high biological activity
Source: Royal Society of Chemistry journal article supplement (doi:10.1039/d3nj00123g), 2023-01-01
Supplement: d3nj00123g1.pdf [file d3nj00123g1.pdf]

Electronic Supplementary Material (ESI) for New Journal of Chemistry  
This journal is © The Royal Society of Chemistry 2023

**A new surfactin-C<sub>17</sub> produced by *Bacillus subtilis* TD7 with a low critical micelle  
concentration and high biological activities**

Wan-Qi Qin,<sup>†a</sup> Dan Fei,<sup>‡b</sup> Lei Zhou,<sup>a</sup> YuJia Guo,<sup>a</sup> Shun An,<sup>a</sup> OuHang Gong,<sup>a</sup> YunYang Wu,<sup>a</sup> Jin-Feng Liu,<sup>ac</sup>  
Shi-Zhong Yang<sup>ad</sup> and Bo-Zhong Mu<sup>\*ad</sup>

---

<sup>a</sup> Key Laboratory of Bioreactor Engineering and School of Chemistry and Molecular Engineering, East China University of Science and Technology, Shanghai 200237, P.R. China.

<sup>b</sup> Institute of Quality Safety and Standards of Agricultural Products, Jiangxi Academy of Agricultural Sciences, Nanchang, Jiangxi, 330200, P. R. China.

<sup>c</sup> Daqing Huali Biotechnology Co., Ltd, Daqing, Heilongjiang, 163511, P. R. China.

<sup>d</sup> Shanghai Collaborative Innovation Center for Biomanufacturing Technology, Shanghai 200237, P.R. China

## Table of Contents

**Table S1** 16S rDNA gene sequencing of *Bacillus subtilis* TD7.

**Figure. S1** RP-HPLC of lipopeptide and the peak of the target substance (N<sub>0</sub>).

**Figure. S2** The total ion and mass chromatograms of the amino acids in the N<sub>0</sub> after trimethylsilylation.

**Figure. S3** The extracted ion chromatograms of the fraction of N<sub>0</sub> ( $m/z = 233$ ).

**Figure. S4** <sup>1</sup>H NMR spectrum (CDCl<sub>3</sub>) of N<sub>0</sub>.

**Figure. S5** <sup>1</sup>H NMR spectrum (CDCl<sub>3</sub>) of fatty acid methyl ester.

**Figure. S6** <sup>13</sup>C NMR spectrum (CDCl<sub>3</sub>) of N<sub>0</sub>.

**Figure. S7** Surface tension versus logarithm of concentrations value of surfactin-C<sub>17</sub>.

Table S1 16S rDNA gene sequencing of *Bacillus subtilis* TD7.

| GenBank accession number          | 16S rDNA gene sequence                                                                                                                                                                                                                                                                                                                                                                                                                                                                                                                                                                                                                                                                                                 |
|-----------------------------------|------------------------------------------------------------------------------------------------------------------------------------------------------------------------------------------------------------------------------------------------------------------------------------------------------------------------------------------------------------------------------------------------------------------------------------------------------------------------------------------------------------------------------------------------------------------------------------------------------------------------------------------------------------------------------------------------------------------------|
| <i>Bacillus subtilis</i> BAB-7106 | ACGATGCGTAGCCGACCTGAGAGGGTGATCGGCCACACTGGGACTGAGACACG<br>GCCCAGACTCCTACGGGAGGCAGCAGTAGGGAATCTTCCGCAATGGACGAAAG<br>TCTGACGGAGCAACGCCGCGTGAGTGATGAAGGTTTTTCGGATCGTAAAGCTCTG<br>TTGTTAGGGAAGAACAAGTACCGTTTCAATAGGGCGGTACCTTGACGGTACCTA<br>ACCAGAAAGCCACGGCTAACTACGTGCCAGCAGCCGCGTAATACGTAGGTGGC<br>AAGCGTTGTCCGGAATTATTGGGCGTAAAGGGCTCGCAGGCGGTTTCTTAAGTC<br>TGATGTGAAAGCCCCGGCTCAACCGGGGAGGGTCATTGGAAACTGGGGA<br>TGAGTGCAGAAGAGGAGAGTGGAATTCCACGTGTAGCGGTGAAATGCGTAGAG<br>ATGTGGAGGAACACCAGTGGCGAAGGCGACTCTCTGGTCTGTA<br>ACTGACGCTGAGGAGCGAAAGCGTGGGGAGCGAACAGGATTAGATACCCTGGTAGTCCACGCCG<br>TAAACGATGAGTGCTAAGTGTAGGGGGTTTTCCGCCCTTAGTGCTGCAGCTAAC<br>GCATTAAGCACTCCGCCTGGGGAGTACGGTCGCAAGACTGAAACTCAAATGAAT<br>TGACGGA |

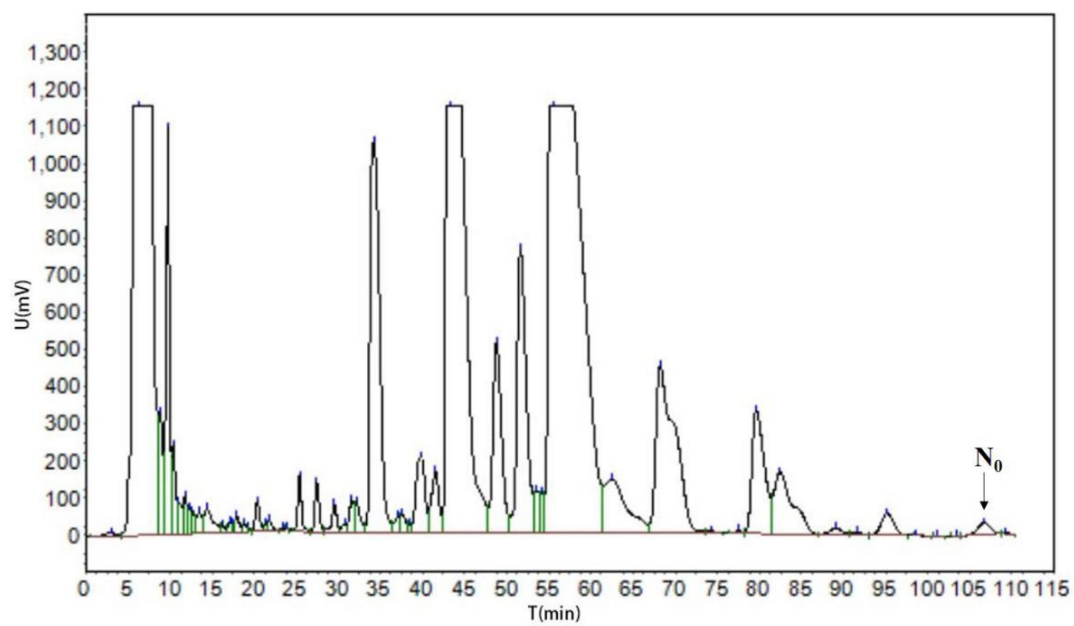

**Figure. S1** RP-HPLC of lipopeptide and the peak of target substance ( $N_0$ ).

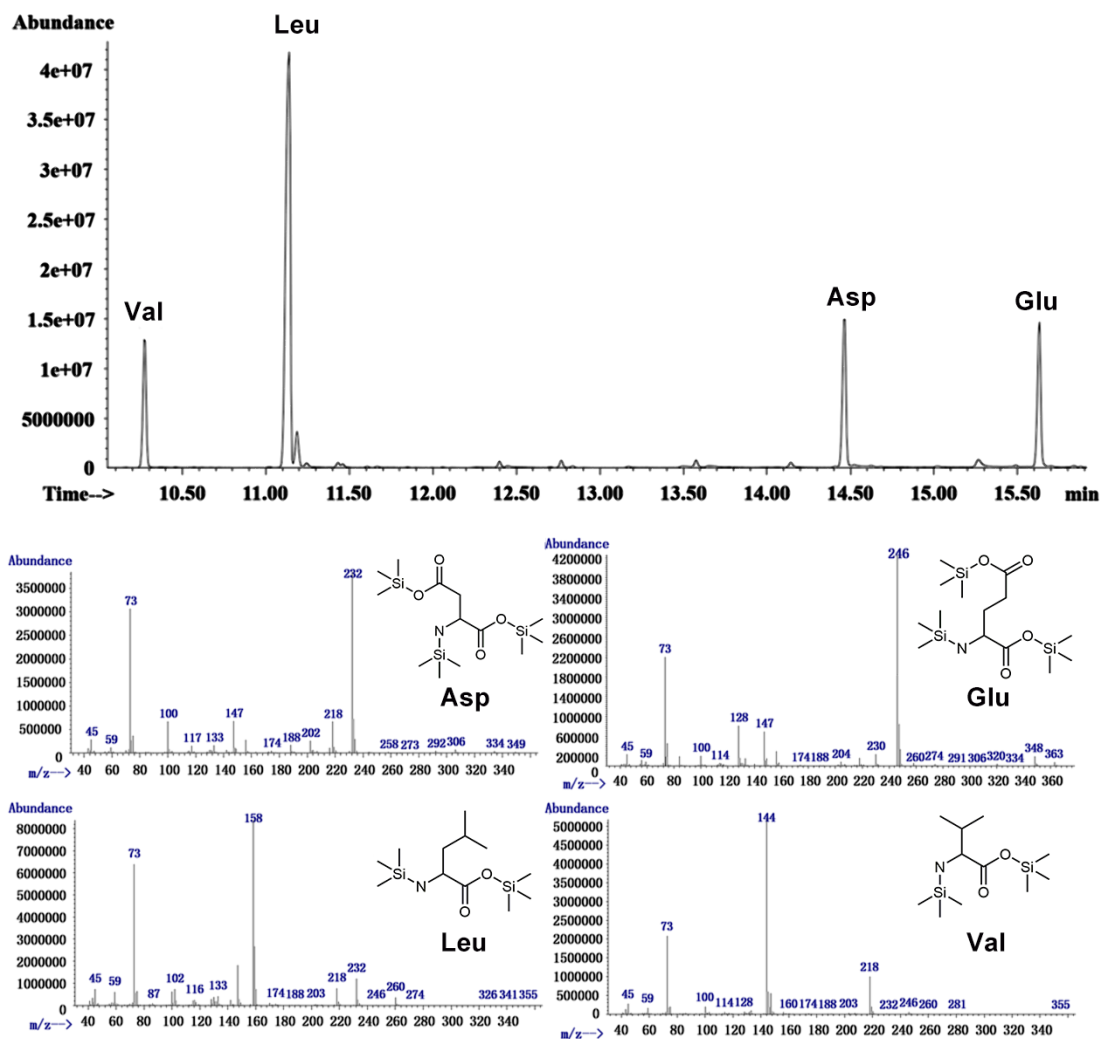

**Figure. S2** The total ion and mass chromatograms of the amino acids in the  $N_0$  after trimethylsilylation.

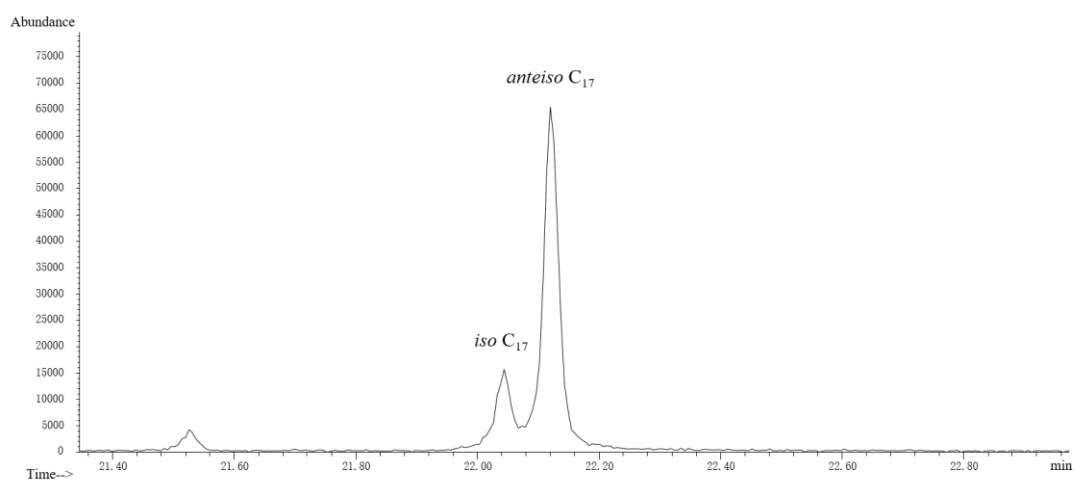

**Figure. S3** The extracted ion chromatogram of the fraction of  $N_0$  ( $m/z = 233$ ).

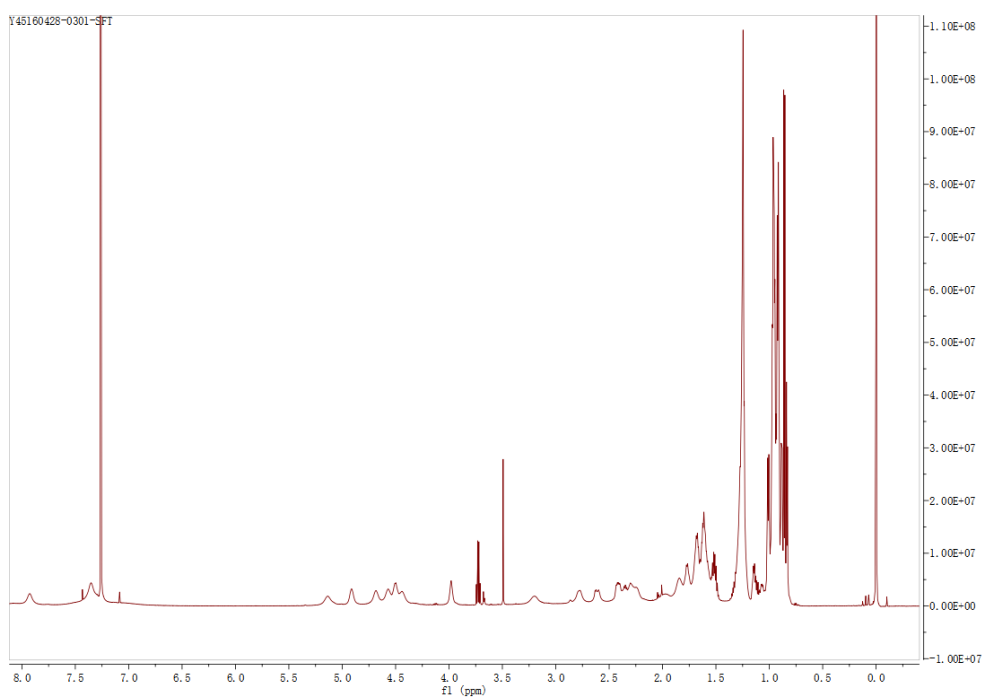

**Figure. S4**  $^1\text{H}$  NMR spectrum ( $\text{CDCl}_3$ ) of  $N_0$ .

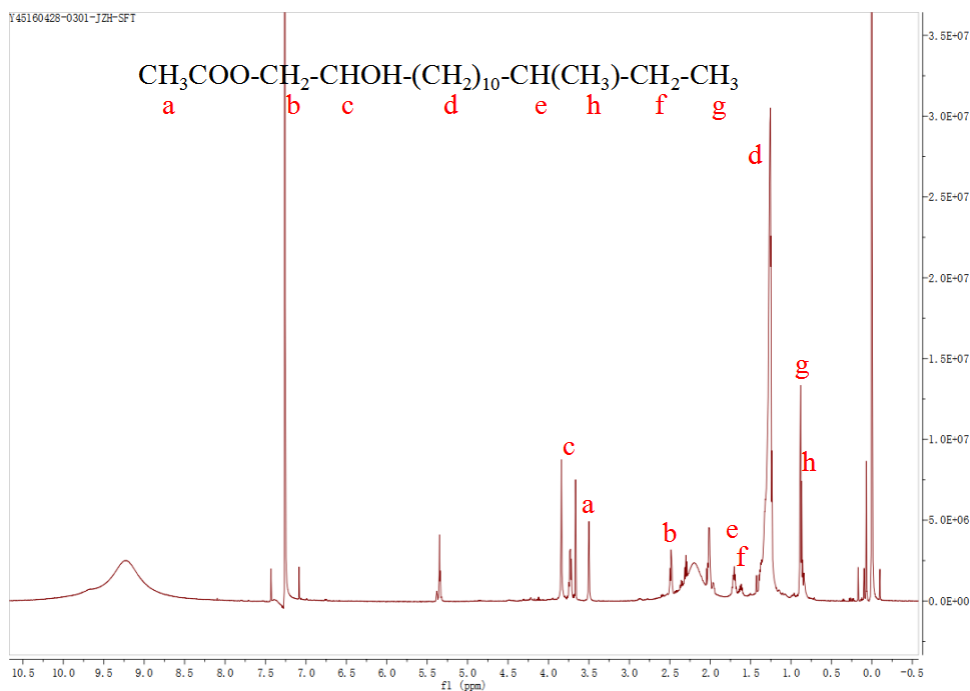

Figure. S5  $^1\text{H}$  NMR spectrum ( $\text{CDCl}_3$ ) of fatty acid methyl ester.

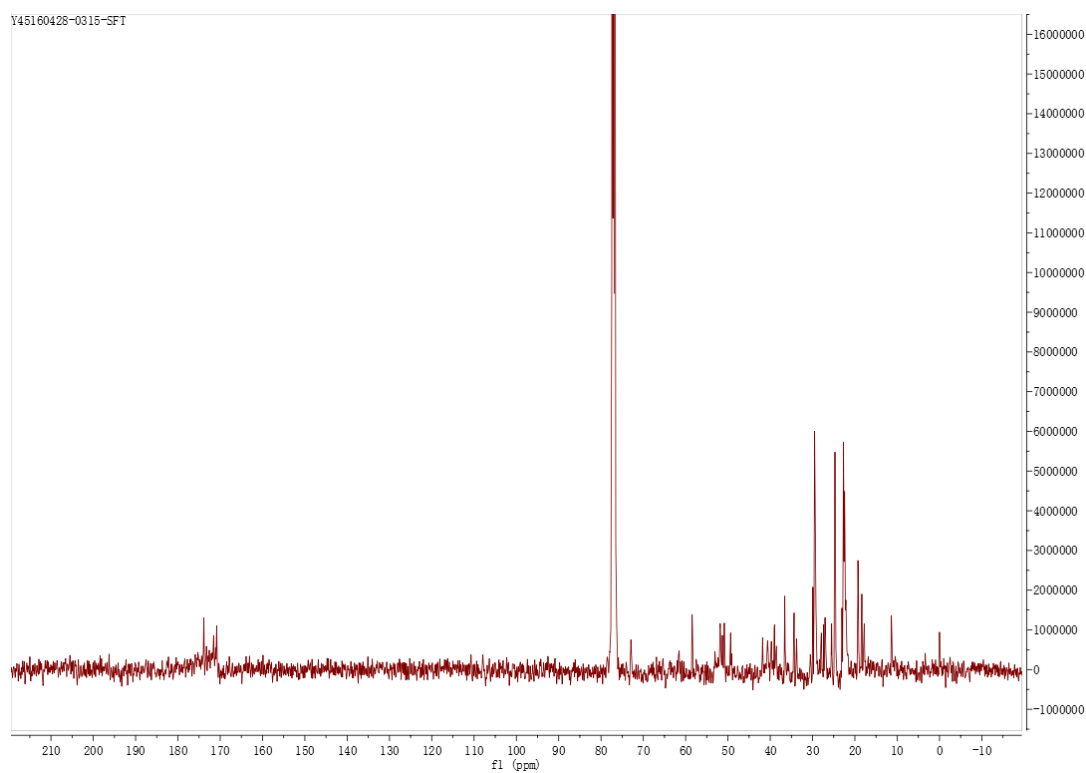

Figure. S6  $^{13}\text{C}$  NMR spectrum ( $\text{CDCl}_3$ ) of  $\text{N}_0$ .

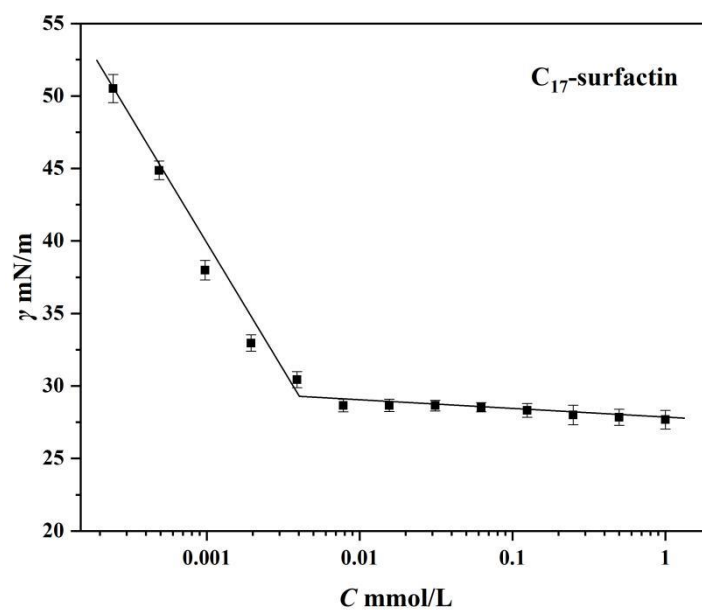

**Figure. S7** Surface tension versus logarithm of concentrations value of surfactin-C<sub>17</sub>.
